# Supplementary material
Source: PubMed Central journal article supplement (PMC4799656)
Supplement: NIHMS764718-supplement-SupplLeg1-10.pdf [file NIHMS764718-supplement-SupplLeg1-10.pdf]

## **Supplementary Figure Legends**

### **Supplementary Figure 1. Cdx2 expression in human gastric epithelial cell**

**lines.** Total RNA was collected from human gastric cancer cell lines and subjected to RT-PCR specific for Cdx2, MUC1, MUC2 and MUC5AC. Expression of GAPDH was also assessed as a loading control. Result shown is the representative of two independent experiments.

### **Supplementary Figure 2. The expression of Cdx2 was enhanced by *H.***

***pylori* infection in gastric epithelial cell.** AGS cells were infected with *H. pylori*. Cell lysates were collected at the indicated time points after infection and subjected to western blotting. Result shown is the representative of two independent experiments.

### **Supplementary Figure 3. Scheme of the Cdx2 promoter-luciferase**

**reporter plasmids used in this study.** Two luciferase reporter constructs (cdx2-luc containing NF- $\kappa$ B binding site and cdx2-N0-luc not containing this

binding site) are depicted.

**Supplementary Figure 4. BAY11-7082 inhibits NF- $\kappa$ B activation.** GCIY cells were transfected with NF- $\kappa$ B luciferase reporter plasmid together with pRL-TK vector. The cells were then infected with *H. pylori* in the presence or absence of the indicated concentrations of BAY11-7082, and relative luciferase activity was measured. Result indicated as mean $\pm$ S.D., \* $P$ <0.05 as compared to *H. pylori*-infected cells. Resultsshown are the representative of two independent experiments.

**Supplementary Figure 5. NOD1 siRNA reduced the expression of NOD1.** AGS cells were transfected with either control-siRNA or human NOD1 specific-siRNA. Expression of NOD1 was evaluated by western blot and Q-PCR.

**Supplementary Figure 6. Cdx2 and MUC2 expression in GSM06 cells.** Total RNA was collected from normal murine gastric epithelial GSM06 cells. The

expression of Cdx2 and MUC2 was evaluated by RT-PCR. RNAs isolated from mouse colon and stomach, were used as positive and negative controls, respectively. Result shown are the representative of two independent experiments.

**Supplementary Figure 7. Pretreatment with iE-DAP reduces *H. pylori* infection-induced Cdx2 expression.** AGS cells were cultured for 24 hours in the presence and the absence of NOD1 ligand. Total RNA was subjected to Q-PCR for Cdx2. Result shown in means  $\pm$  S.D. \* $P < 0.05$  as compared to *H. pylori*-infected AGS cells. Result shown is the representative of three independent experiments.

**Supplementary Figure 8. iE-DAP alone does not alter Cdx2 expression.** AGS cells and GCIY cells were cultured in the presence and the absence of NOD1 ligand iE-DAP for 24 hours. Then total RNA was extracted from the cells and subjected to Q-PCR for Cdx2.

**Supplementary Figure 9. Inflammatory scores of the stomach did not differ between NOD1-intact and NOD1-deficient mice.** NOD1-deficient and NOD1-intact mice were infected with *cagPAI*-positive *H. pylori*; one year after infection the mice were sacrificed and gastric tissues were collected and subjected to HE staining (n=5/group). The degree of inflammatory cell infiltration was scored according to the criteria developed by Rogers et al. (see Methods). Result shown is the representative of five independent experiments.

**Supplementary Figure 10. TNF- $\alpha$  was induced in the stomachs of *H. pylori*-infected mice.** NOD1-deficient and NOD1-intact mice were infected with *cagPAI*-positive *H. pylori*; one year after infection the mice were sacrificed and gastric tissues were collected and subjected to Q-PCR for TNF- $\alpha$  (n=5/group). Result shown in means  $\pm$  S.D. \* $P < 0.05$  as compared to *H. pylori*-uninfected mice. Result shown is the representative of five independent experiments.
